# Supplementary material for: Synthesis and PET Imaging Biodistribution Studies of Radiolabeled Iododiflunisal, a Transthyretin Tetramer Stabilizer, Candidate Drug for Alzheimer’s Disease
Source: MDPI journal article supplement (doi:10.3390/molecules29020488), 2024-01-18
Supplement: s1 [file s1]

# Synthesis and PET imaging biodistribution studies of radiolabeled iododiflunisal, a transthyretin tetramer stabilizer, candidate drug for Alzheimer's disease

Sameer M. Joshi,<sup>1,2</sup> Thomas Wilson,<sup>3</sup> Zibo Li,<sup>2,4</sup> Sean Preshlock,<sup>3</sup> Vanessa Gómez Vallejo,<sup>1</sup> Véronique Gouverneur,<sup>3</sup> Jordi Llop<sup>1,\*</sup> and Gemma Arsequell<sup>5,\*</sup>

<sup>1</sup> CIC biomaGUNE, Basque Research and Technology Alliance (BRTA), Paseo Miramón 182, Parque Tecnológico de San Sebastián, 20009 Donostia-San Sebastián, Gipuzkoa, Spain; S.M.J.: [sameerjoshi94@gmail.com](mailto:sameerjoshi94@gmail.com); V.G.-V.: [vgomez@cicbiomagune.es](mailto:vgomez@cicbiomagune.es); J.L.: [jllop@cicbiomagune.es](mailto:jllop@cicbiomagune.es)

<sup>2</sup> Department of Radiology, The University of North Carolina at Chapel Hill, Chapel Hill, North Carolina 27599, United States. [sameerjoshi94@gmail.com](mailto:sameerjoshi94@gmail.com)

<sup>3</sup> Chemistry Research Laboratory, Oxford University, OX1 3TA, UK. T.W.: [tcwilson1610@gmail.com](mailto:tcwilson1610@gmail.com); V.G.: S.P. deceased; V.G.: [veronique.gouverneur@chem.ox.ac.uk](mailto:veronique.gouverneur@chem.ox.ac.uk)

<sup>4</sup> Lineberger Comprehensive Cancer Center, The University of North Carolina at Chapel Hill, Chapel Hill, North Carolina 27514, United States. [zibo\\_li@med.unc.edu](mailto:zibo_li@med.unc.edu)

<sup>5</sup> Institut de Química Avançada de Catalunya (IQAC), Spanish National Research Council (CSIC), 08034, Barcelona, Spain. [gemma.arsequell@iqac.csic.es](mailto:gemma.arsequell@iqac.csic.es)

\* Correspondence: J.L.: [jllop@cicbiomagune.es](mailto:jllop@cicbiomagune.es); G.A. [gemma.arsequell@iqac.csic.es](mailto:gemma.arsequell@iqac.csic.es).

**$^1\text{H}$ ,  $^{13}\text{C}$ , and  $^{19}\text{F}$  NMR Data:**

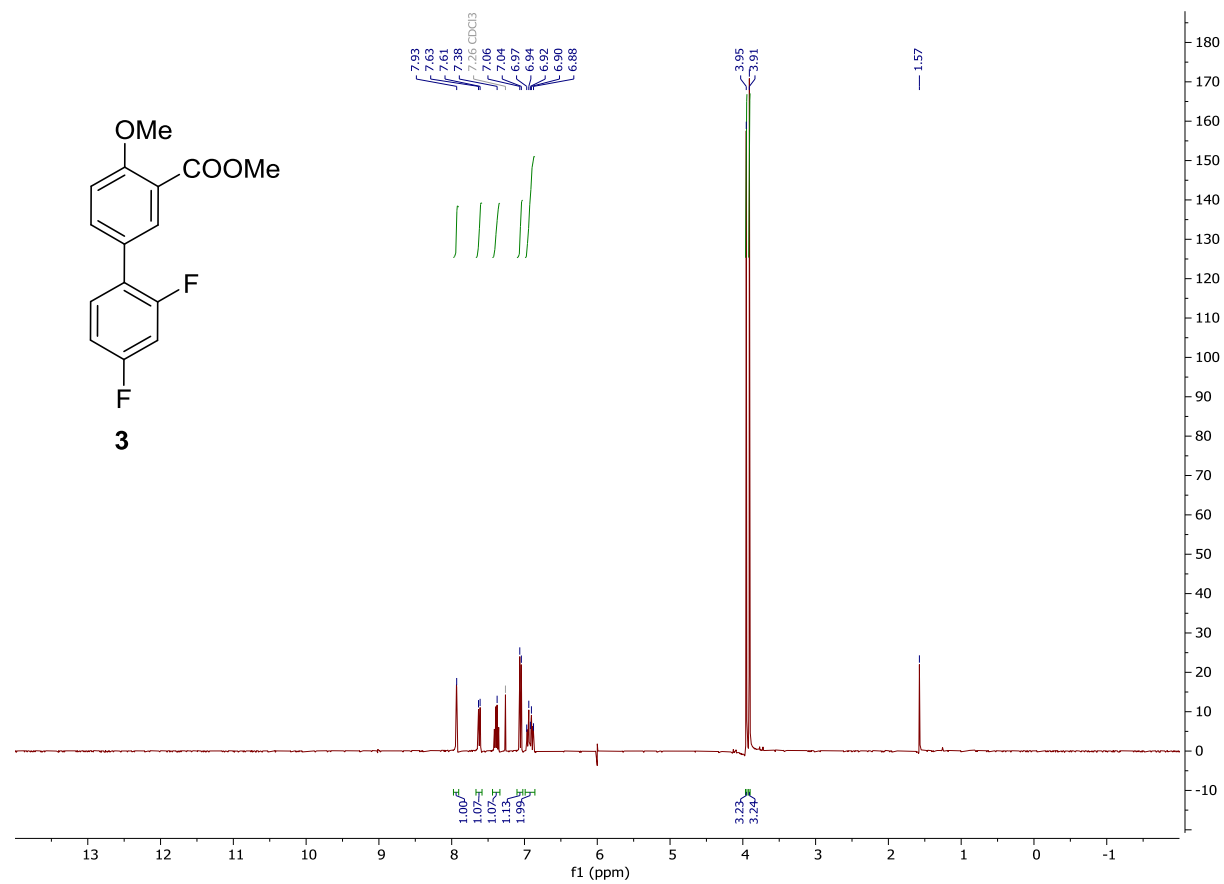

**Figure S1:**  $^1\text{H}$  NMR of compound **3** at 400 MHz NMR spectrometer.

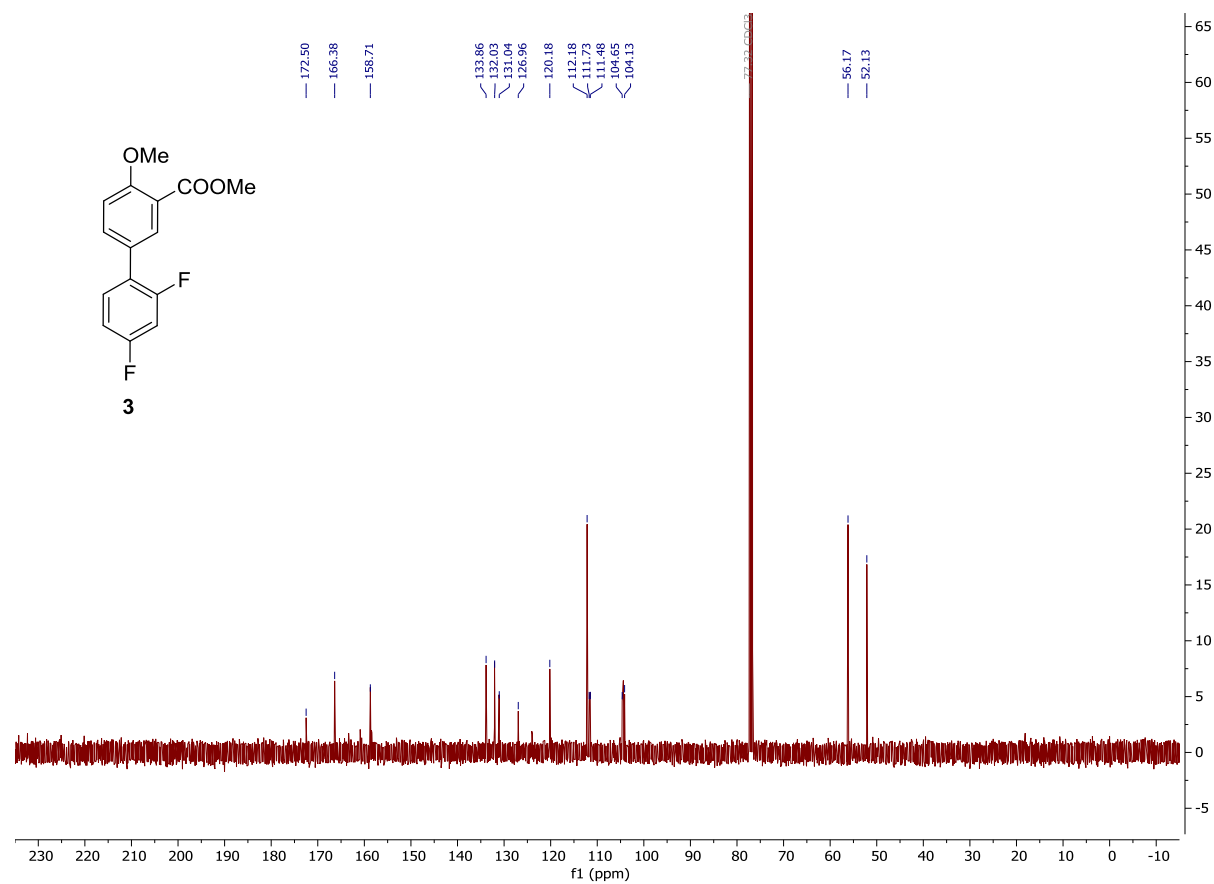

**Figure S2:**  $^{13}\text{C}$  NMR of compound **3** at 100 MHz NMR spectrometer.

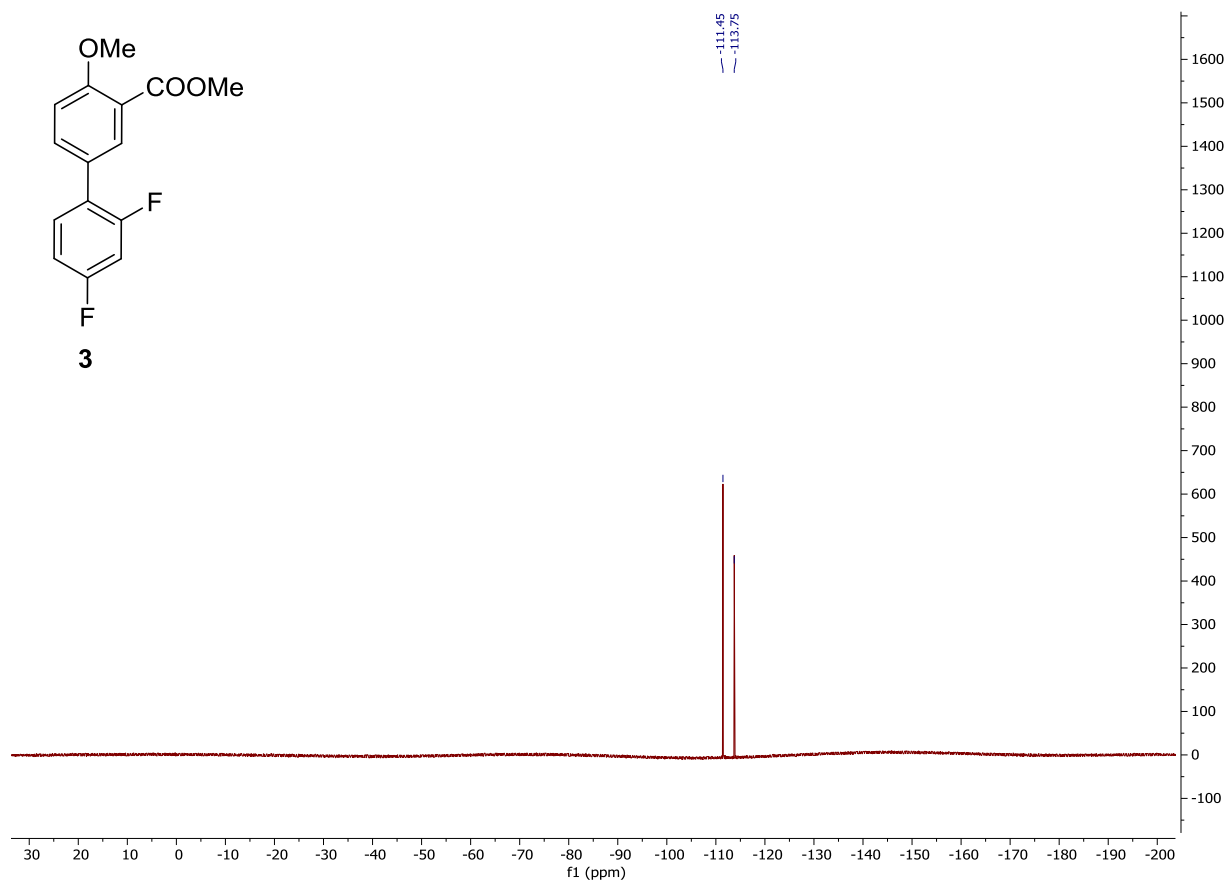

**Figure S3:** <sup>19</sup>F NMR spectrum of methyl compound **3** at 400 MHz NMR spectrometer.

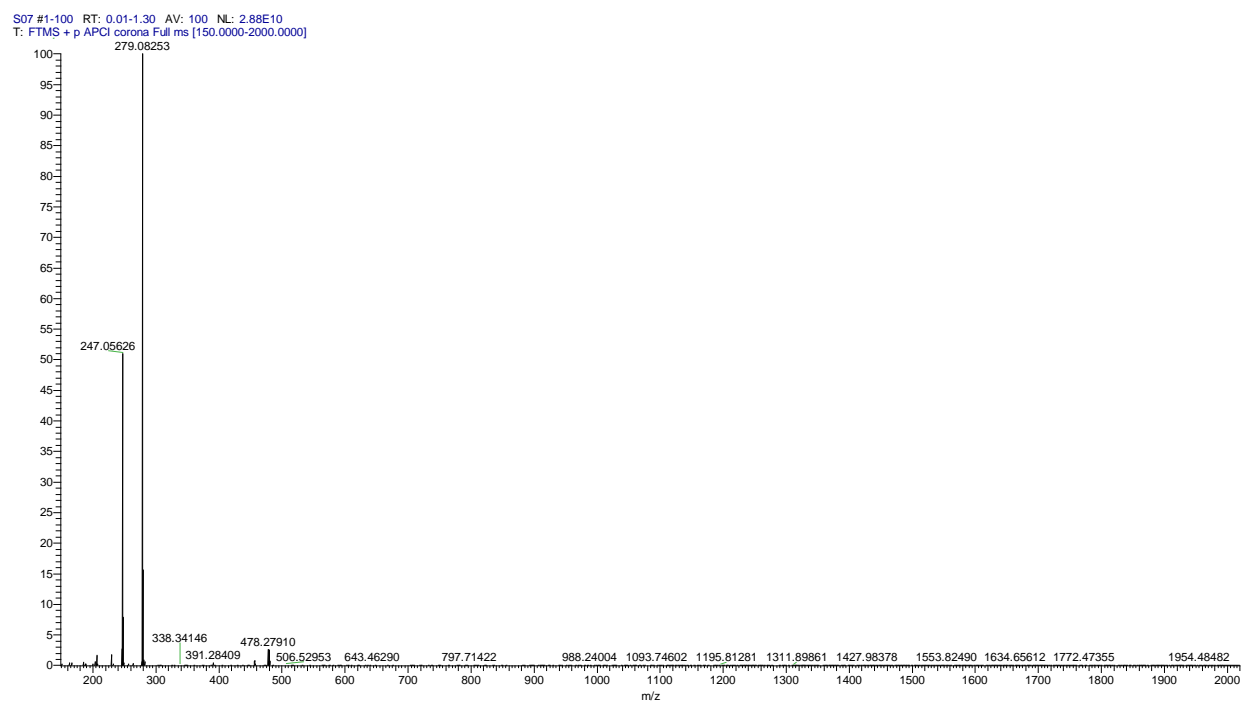

**Figure S4:** HRMS spectrum of methyl compound **3**.

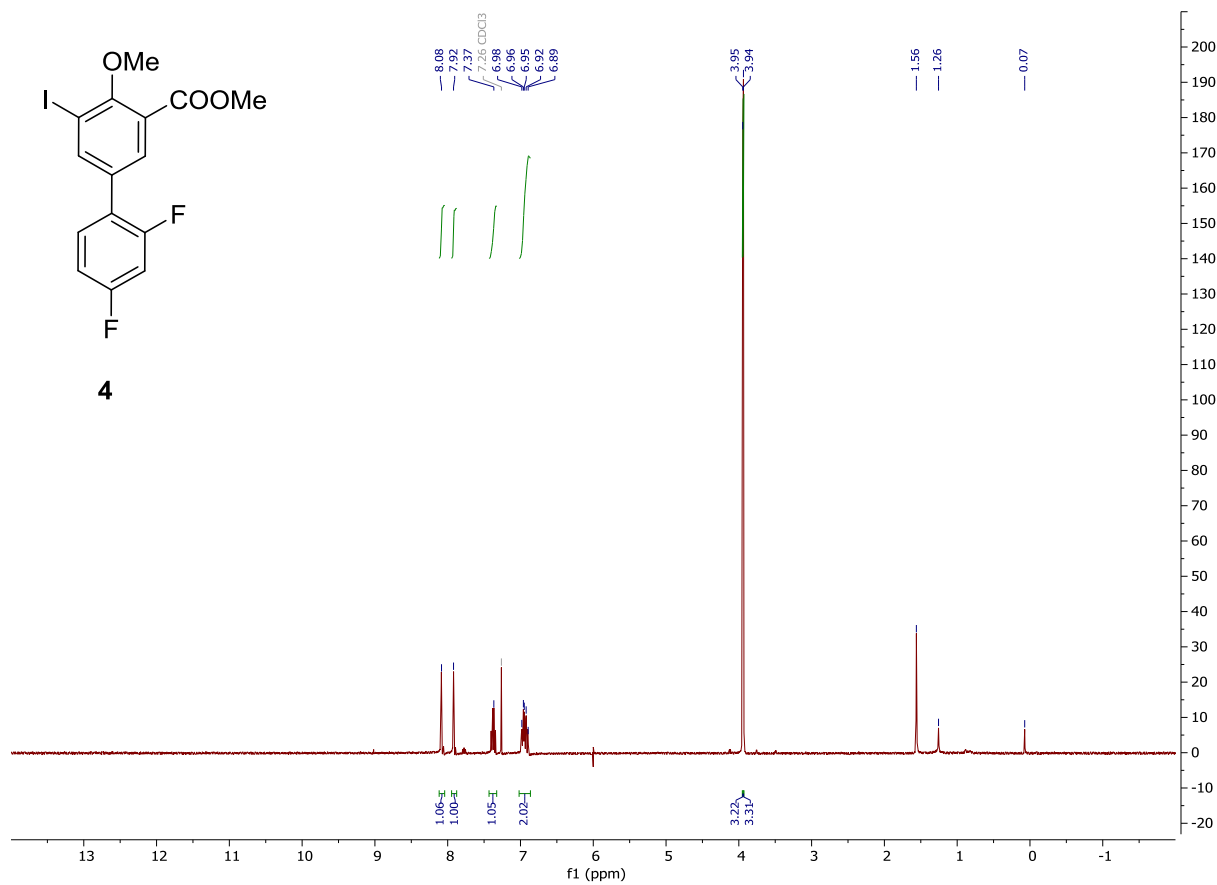

**Figure S5:** <sup>1</sup>H NMR spectrum of compound **4** at 400 MHz NMR spectrometer.

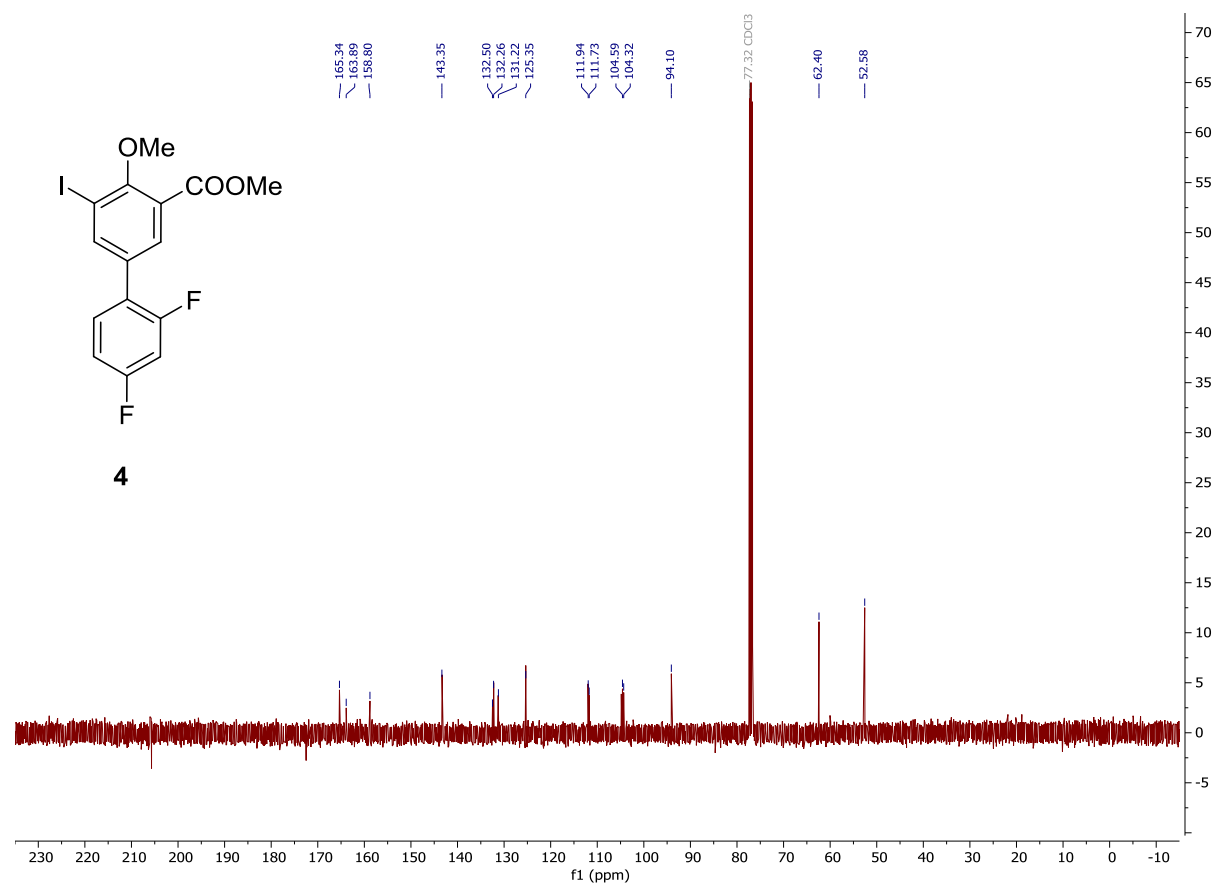

**Figure S6:**  $^{13}\text{C}$  NMR spectrum of compound **4** at 100 MHz NMR spectrometer.

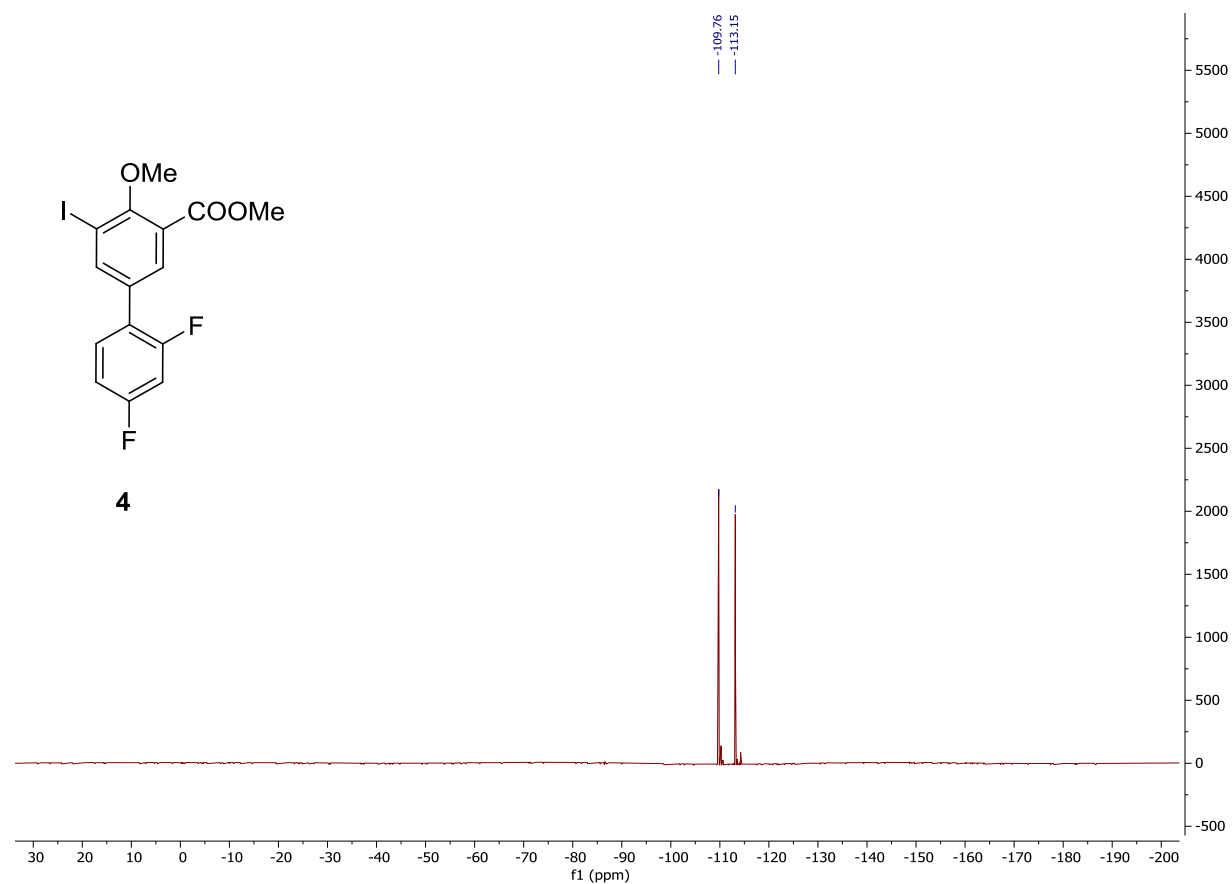

**Figure S7:** <sup>19</sup>F NMR spectrum of methyl compound **4** at 400 MHz NMR spectrometer.

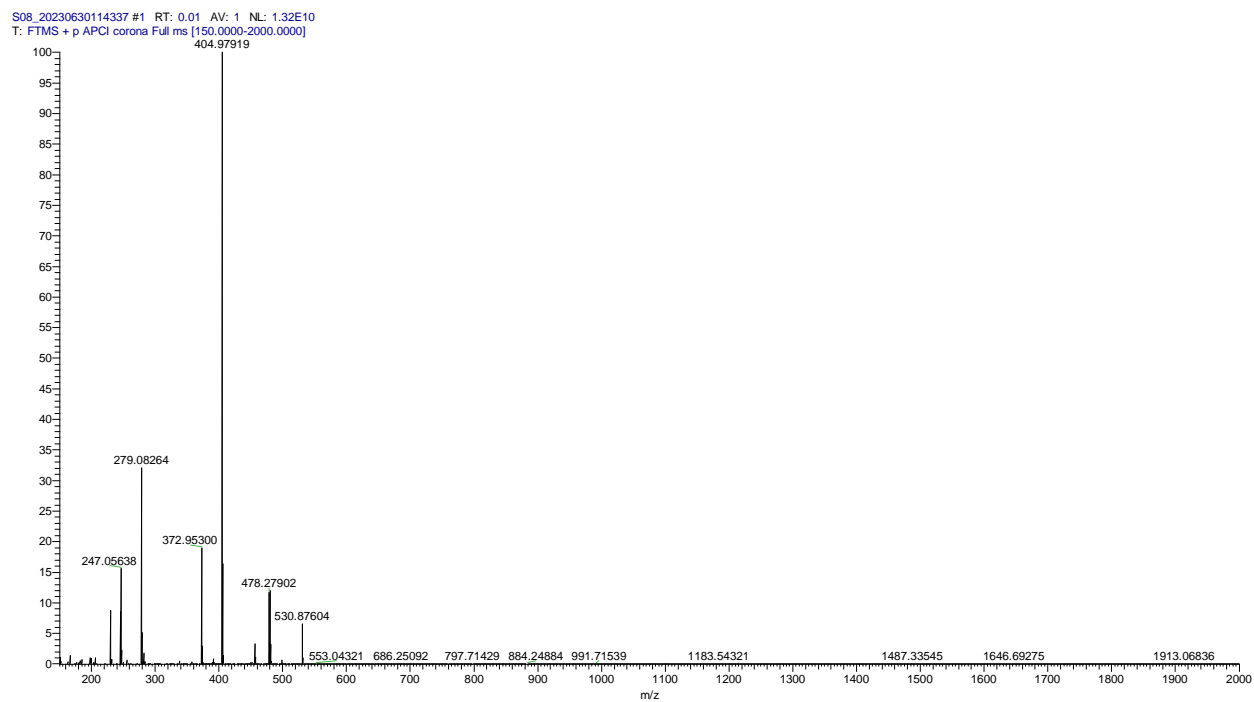

**Figure S8:** HRMS spectrum of compound **4**.

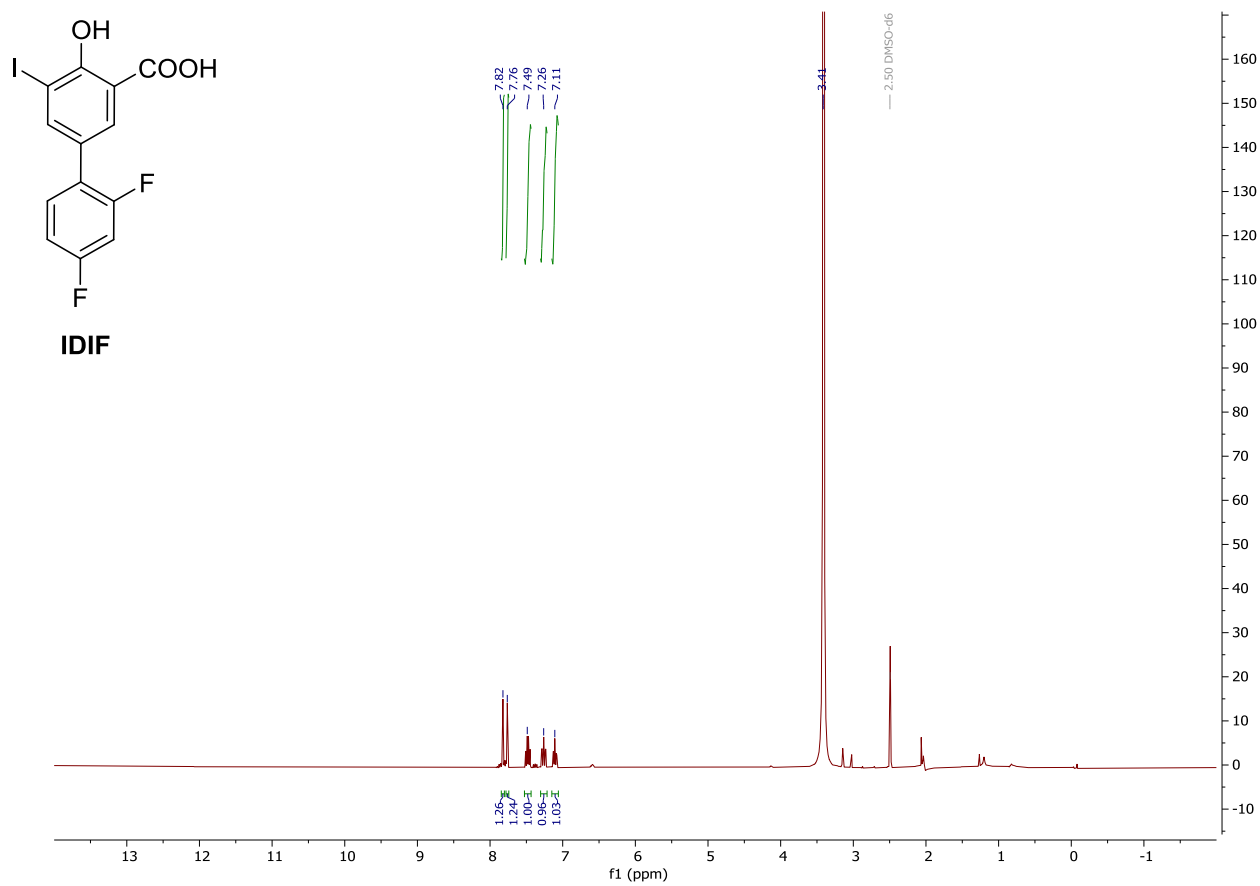

**Figure S9:**  $^1\text{H}$  NMR spectrum of IDIF **2** at 400 MHz NMR spectrometer.



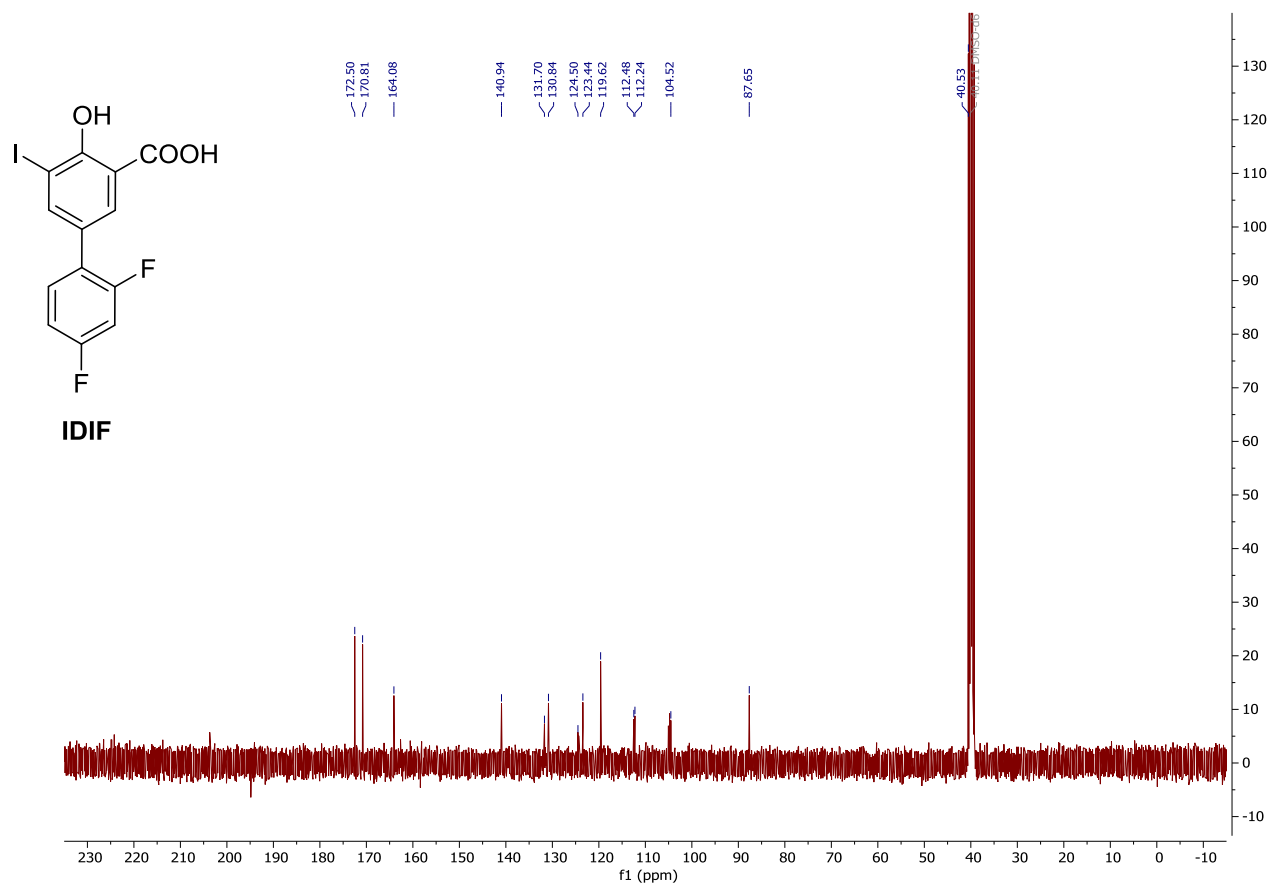

**Figure S10:**  $^{13}\text{C}$  NMR spectrum of IDIF **2** at 100 MHz NMR spectrometer.

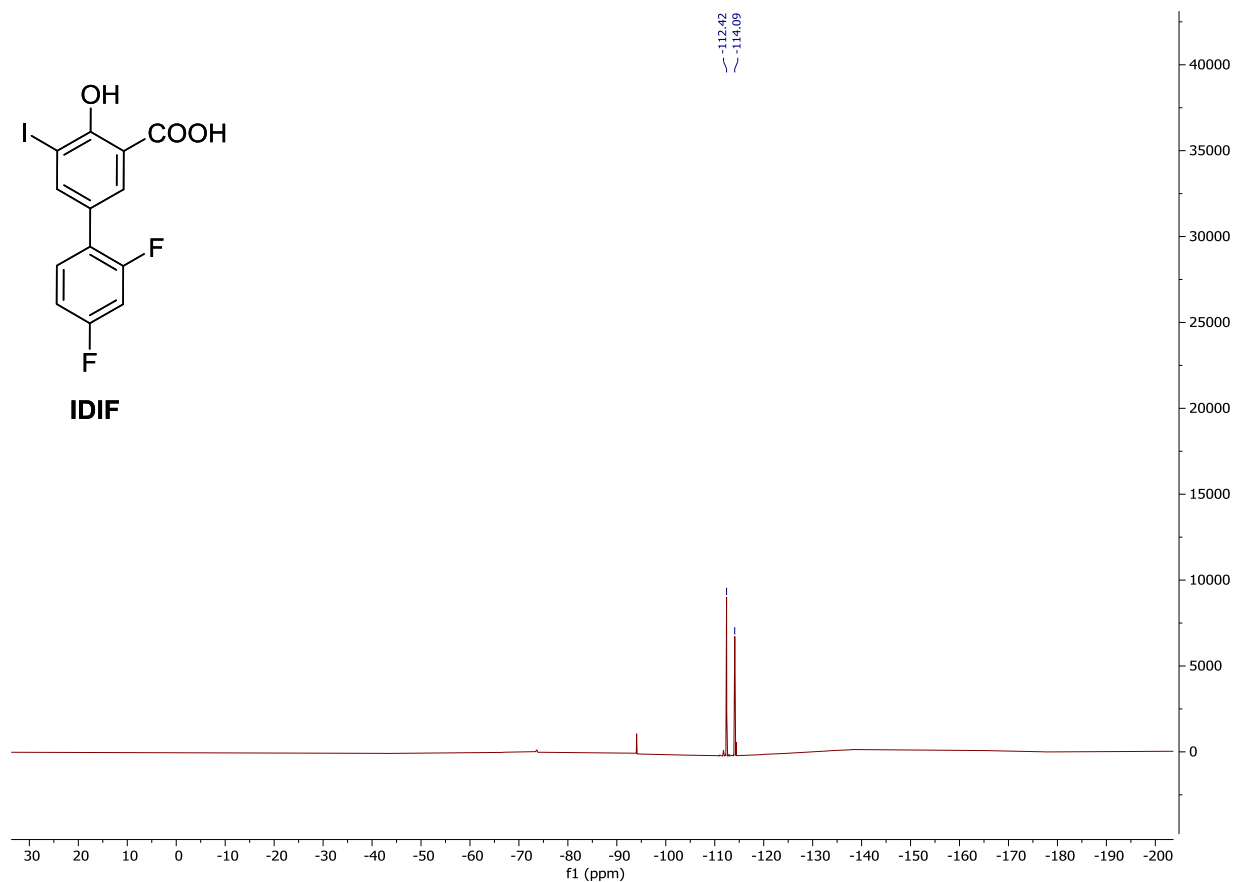

**Figure S11:**  $^{19}\text{F}$  NMR spectrum of IDIF 2 at 400 MHz NMR spectrometer.

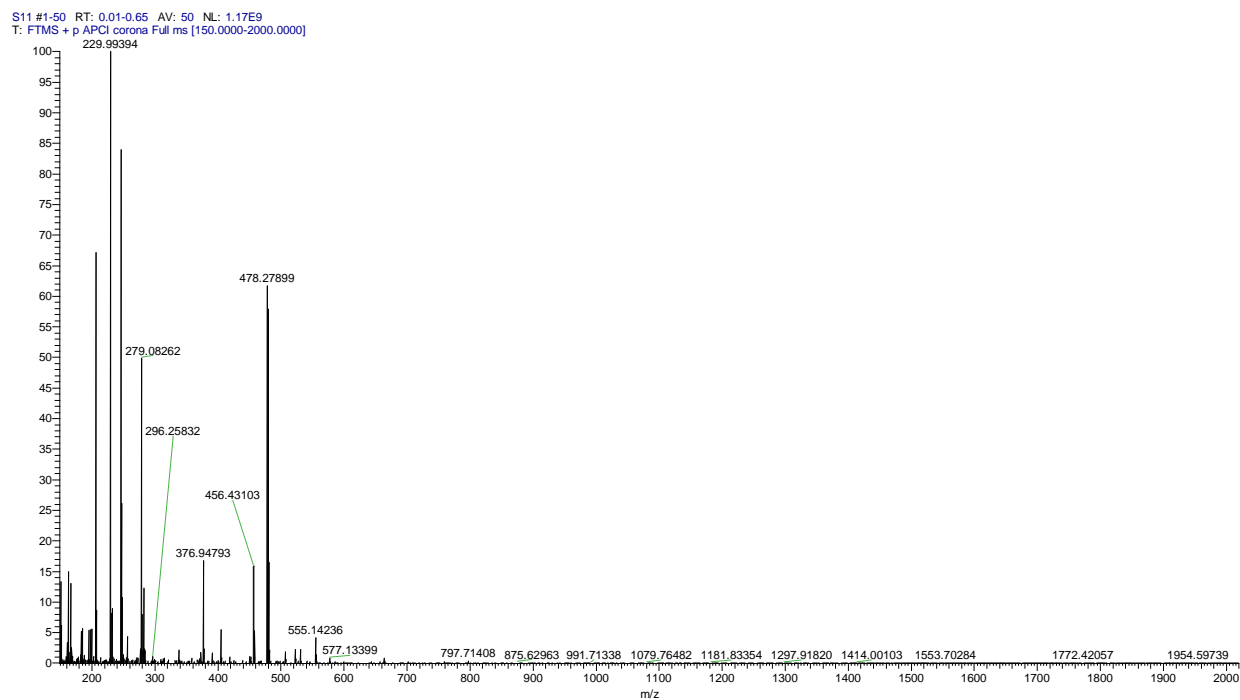

**Figure S12:** HRMS spectrum of IDIF 2.

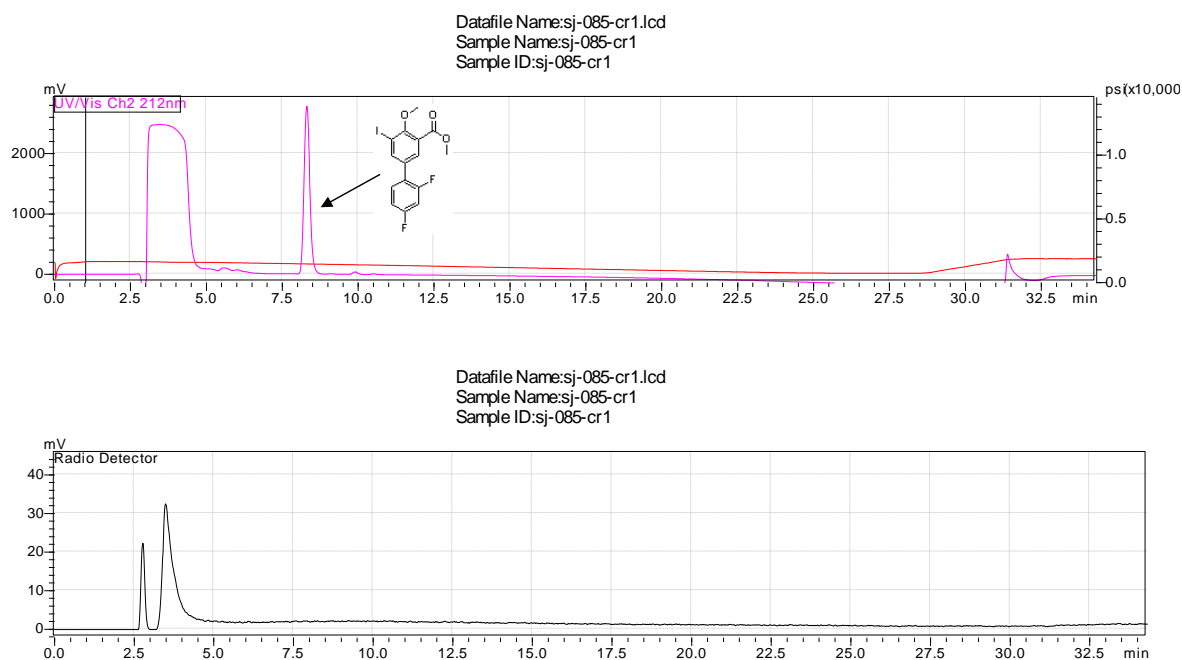

**Figure S13:** HPLC chromatogram (UV-212 nm and radioactive detector) for  $^{18}\text{F}$  exchange study in NMP solvent at  $140^{\circ}\text{C}$  for 30 minutes. No peaks are detected in the radioactive chromatogram at retention time = 8-8.5 min, confirming that isotopic exchange reaction did not occur under these experimental conditions.

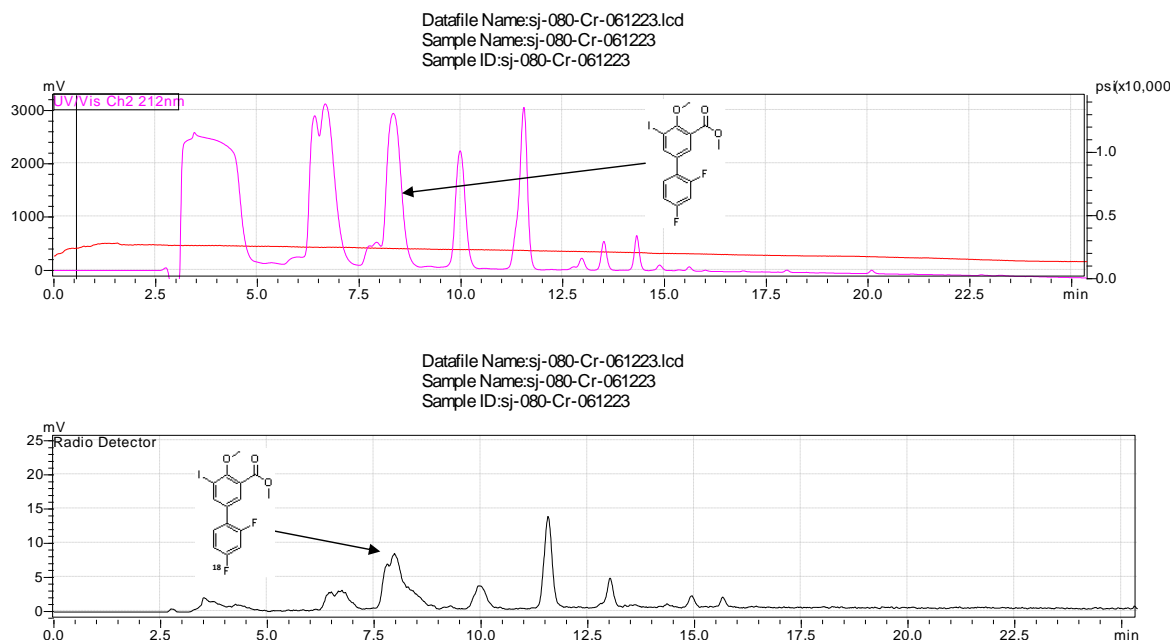

**Figure S14:** HPLC chromatogram (UV-212 nm and radioactive detector) for  $^{18}\text{F}$  exchange study in NMP solvent at  $180^{\circ}\text{C}$  for 30 minutes. The presence of a peak at the same retention time as the reference standard (retention time = 8-8.5 min) suggests the formation of the desired labelled compound, although several labelled impurities are also observed.

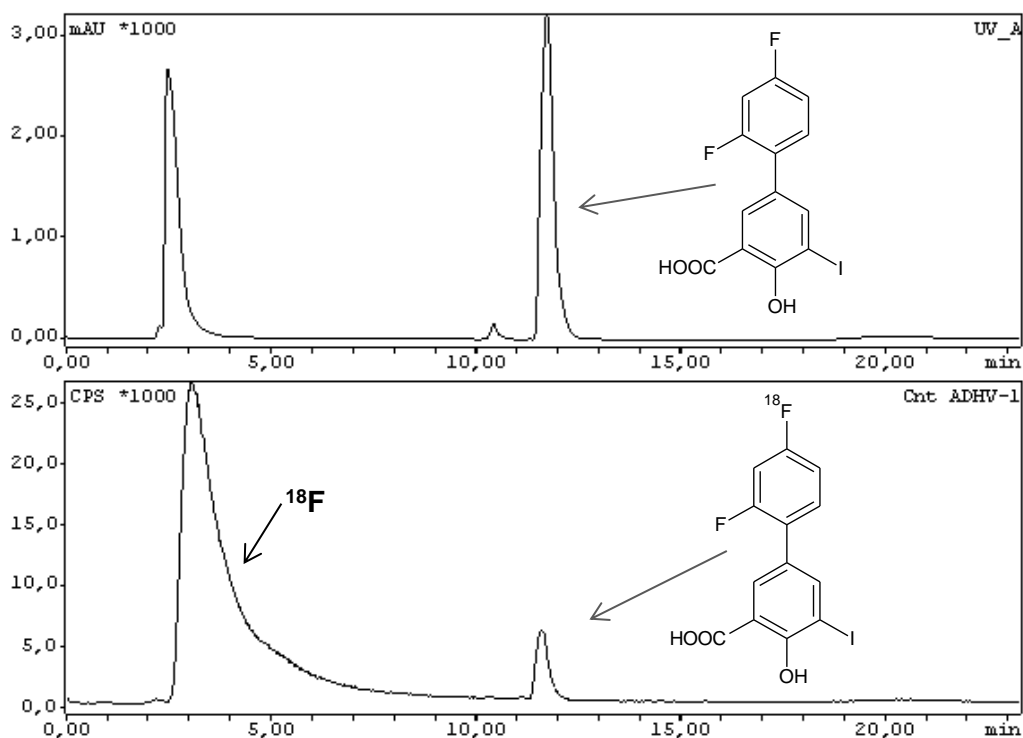

**Figure S15:** HPLC chromatogram (UV-254 nm and radioactive detector) for  $^{18}\text{F}$  exchange study in DMSO solvent at  $160^\circ\text{C}$  for 20 minutes. The presence of a peak at the same retention time as the reference standard suggests the formation of the desired labelled compound.

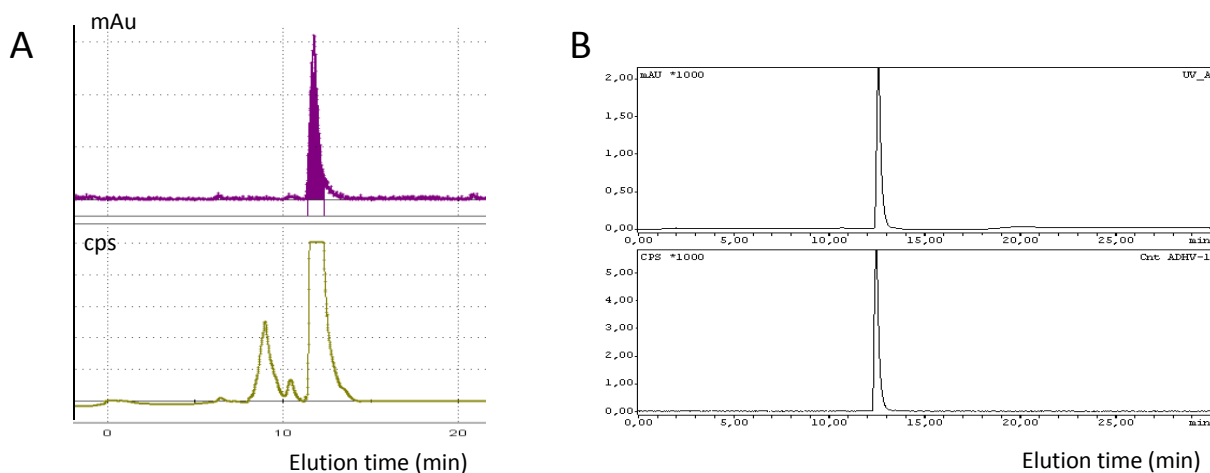

**Figure S16:** A) Semi-preparative HPLC chromatogram (UV-254 nm and radioactive detector) for  $^{18}\text{F}$  exchange study in DMSO solvent at  $160^\circ\text{C}$  for 20 minutes. The collected peak (retention time ca. 12 min) is indicated with solid filling; B) HPLC chromatogram (UV-254 nm and radioactive detector) corresponding to quality control of the collected fraction.
